# Supplementary material for: Defect clustering in an Eu-doped NaMgF3 compound and its influence on luminescent properties
Source: Royal Society of Chemistry journal article supplement (doi:10.1039/d0ma00953a), 2021-01-01
Supplement: d0ma00953a1.pdf [file d0ma00953a1.pdf]

## Supporting Information

### Defect clustering in an Eu-doped NaMgF<sub>3</sub> compound and its influence on luminescent properties

Afranio Sousa,<sup>a</sup> Adelmo Souza<sup>b</sup> and Heveson Lima<sup>c</sup>

<sup>a</sup>Departamento de Física, Universidade Federal de Sergipe, 49100-000, São Cristóvão, SE, Brazil

<sup>b</sup>Centro Multidisciplinar do *Campus* de Bom Jesus da Lapa, Universidade Federal do Oeste da Bahia, 47600-000, Bom Jesus da Lapa, BA, Brazil

<sup>c</sup>Centro Multidisciplinar do *Campus* de Luís Eduardo Magalhães, Universidade Federal do Oeste da Bahia, 47850-000, Luís Eduardo Magalhães, BA, Brazil

#### (A) Cubic NaMgF<sub>3</sub>

**Table S1-** Lattice parameters and interatomic distance for cubic NaMgF<sub>3</sub>.

| Lattice parameters   | Ref. 1  | This work | %    |
|----------------------|---------|-----------|------|
| a(A)                 | 3.876   | 3.885     | 0.22 |
| V(A <sup>3</sup> )   | 58.2306 | 58.6139   | 0.66 |
| Interatomic distance | Ref.1   | This work | %    |
| Na-F (x12)           | 2.741   | 2.747     | 0.22 |
| Mg-F (x6)            | 1.938   | 1.942     | 0.20 |
| F-F (x8)             | 2.741   | 2.747     | 0.22 |

**Table S2-** Elastic constants for cubic NaMgF<sub>3</sub>.

| Elastic Constants | Ref. 2   | This work |
|-------------------|----------|-----------|
| C <sub>11</sub>   | 136.9082 | 151.4231  |
| C <sub>12</sub>   | 31.8473  | 41.7655   |
| C <sub>44</sub>   | 51.0104  | 41.7655   |

## (B) Fluoride precursors (NaF and MgF<sub>2</sub>)

**Table S3-** Lattice parameters for NaF.

| Lattice parameters    | Ref. 3   | This work | %      |
|-----------------------|----------|-----------|--------|
| $a$ (Å)               | 4.65     | 4.6599    | 0.2129 |
| $V$ (Å <sup>3</sup> ) | 100.5450 | 101.1895  | 0.6410 |

**Table S4-** Elastic constants for NaF.

| Elastic constants | Ref. 4 | This work | %     |
|-------------------|--------|-----------|-------|
| $C_{11}$          | 108.5  | 98.7431   | -8.99 |
| $C_{12}$          | 22.90  | 28.3125   | 23.64 |
| $C_{44}$          | 28.99  | 28.325    | -2.34 |

**Table S5-** Dielectric constants for NaF

| Dielectric constants | Ref. 4 | This work | %   |
|----------------------|--------|-----------|-----|
| $\epsilon_0$         | 4.73   | 4.83      | 2.1 |
| $\epsilon_\infty$    | 1.75   | 1.91      | 9.1 |

**Table S6-** Lattice parameters for MgF<sub>2</sub>.

| Lattice parameters    | Ref. 5  | This work | %     |
|-----------------------|---------|-----------|-------|
| $a$ (Å)               | 4.6213  | 4.5447    | -1.66 |
| $b$ (Å)               | 3.0519  | 3.1540    | 3.35  |
| $V$ (Å <sup>3</sup> ) | 65.1776 | 65.1456   | -0.05 |

**Table S7-** Elastic constants for MgF<sub>2</sub>.

| Elastic Constants | Ref. 6 | Ref. 7 | This work |
|-------------------|--------|--------|-----------|
| $C_{11}$          | 140.80 | 142.70 | 120.89    |
| $C_{12}$          | 90.00  | 92.20  | 94.50     |
| $C_{13}$          | 63.50  | 64.10  | 68.90     |
| $C_{33}$          | 205.30 | 204.00 | 213.66    |
| $C_{44}$          | 56.70  | 56.70  | 52.02     |
| $C_{66}$          | 95.70  | 93.50  | 95.14     |

### (C) Defect calculations

**Table S8-** Lattice energy for orthorhombic NaMgF<sub>3</sub>, fluorides precursors and dopants.

| Materials          | Lattice energies (eV) |
|--------------------|-----------------------|
| NaMgF <sub>3</sub> | -39.784               |
| NaF                | -9.573                |
| MgF <sub>2</sub>   | -29.998               |
| EuF <sub>3</sub>   | -51.717               |
| EuF <sub>2</sub>   | -25.430               |

**Table S9-** Defect formation energy for selected defects.

| Defect Energy (eV)    |                           |                 |                   |                     |
|-----------------------|---------------------------|-----------------|-------------------|---------------------|
| $V_{Na}^{\cdot}$      | $V_{Mg}^{\bullet\bullet}$ | $V_F^{\cdot}$   | $Na_{Mg}^{\cdot}$ | $Mg_{Na}^{\bullet}$ |
| 6.209                 | 24.445                    | 5.821           | 17.264            | -15.016             |
| Interstitial Position |                           | Na <sub>i</sub> | Mg <sub>i</sub>   | F <sub>i</sub>      |
| (1/2,1/4,1/4)         |                           | -2.848          | -16.860           | -2.171              |
| (1/2,1/8,1/4)         |                           | -2.847          | -16.865           | -2.472              |
| (1/2,1/2,1/4)         |                           | -2.848          | -16.851           | -2.433              |
| (1/4,1/4,1/4)         |                           | -2.848          | -16.854           | -2.228              |

**Table S10-** Defect formation energy of Eu<sup>3+</sup> and Eu<sup>2+</sup> isolated ions doped orthorhombic NaMgF<sub>3</sub>.

| Impurity (Eu <sup>3+</sup> ) | Energy defects (eV) |
|------------------------------|---------------------|
| $Eu_{Na}^{\bullet\bullet}$   | -31.047             |
| $Eu_{Mg}^{\bullet}$          | -15.276             |
| Impurity (Eu <sup>2+</sup> ) | Energy defects (eV) |
| $Eu_{Na}^{\bullet}$          | -10.460             |
| $Eu_{Mg}^{\times}$           | 6.564               |

**Table S11-** Solution energies of Eu<sup>3+</sup> doped NaMgF<sub>3</sub>.

| Schemes                                                              | Solution Energies (bound defects) (in eV) |
|----------------------------------------------------------------------|-------------------------------------------|
| <b>Incorporating into Na site</b>                                    |                                           |
| $Eu_{Na}^{\bullet\bullet} + 2F_i'$                                   | 3.256                                     |
| $Eu_{Na}^{\bullet\bullet} + V_{Mg}''$                                | 2.758                                     |
| $Eu_{Na}^{\bullet\bullet} + 2V_{Na}'$                                | 2.914                                     |
| $Eu_{Na}^{\bullet\bullet} + 2Na_{Mg}'$                               | 2.580                                     |
| $2Eu_{Na}^{\bullet\bullet} + V_{Mg}'' + 2F_i'$                       | 6.105                                     |
| <b>Incorporating into Mg site</b>                                    |                                           |
| $Eu_{Mg}^{\bullet} + F_i'$                                           | 2.449                                     |
| $Eu_{Mg}^{\bullet} + V_{Na}'$                                        | 2.129                                     |
| $2Eu_{Mg}^{\bullet} + V_{Mg}''$                                      | 5.641                                     |
| $Eu_{Mg}^{\bullet} + Na_{Mg}'$                                       | 2.843                                     |
| $2Eu_{Mg}^{\bullet} + Mg_{Na}^{\bullet} + 3F_i'$                     | 5.173                                     |
| <b>Incorporating into Na and Mg sites</b>                            |                                           |
| $Eu_{Mg}^{\bullet} + Eu_{Na}^{\bullet\bullet} + 2V_{Na}' + F_i'$     | 5.310                                     |
| $Eu_{Mg}^{\bullet} + Eu_{Na}^{\bullet\bullet} + V_{Mg}'' + Na_{Mg}'$ | 7.247                                     |

**Table S12-** Solution energies of Eu<sup>2+</sup> doped NaMgF<sub>3</sub>.

| Schemes                               | Solution Energy (bound defects) (in eV) |
|---------------------------------------|-----------------------------------------|
| <b>Incorporating into Na site</b>     |                                         |
| $Eu_{Na}^{\bullet} + F_i'$            | 2.623                                   |
| $2Eu_{Na}^{\bullet} + V_{Mg}''$       | 2.952                                   |
| $Eu_{Na}^{\bullet} + V_{Na}'$         | 1.572                                   |
| $2Eu_{Na}^{\bullet} + V_{Na}' + F_i'$ | 3.729                                   |
| $Eu_{Na}^{\bullet} + V_F' + 2F_i'$    | 2.438                                   |
| $Eu_{Na}^{\bullet} + Na_{Mg}'$        | 1.523                                   |
| $Eu_{Na}^{\bullet} + V_{Mg}'' + V_F'$ | 3.224                                   |
| $Eu_{Na}^{\bullet} + 2V_{Na}' + V_F'$ | 3.589                                   |
| <b>Incorporating into Na site</b>     |                                         |
| $Eu_{Mg}^{\times}$                    | 1.996                                   |

## Reference

- (1) J. Chen, H. Liu, C. D. Martin, J. B. Parise and J. Weidner, *Am. Miner.*, 2005, **90**, 1534-1539.
- (2) R. Arar, T. Ouahrani, D. Varshney, R. Khenata, G. Murtaza, D. Rached, A. Bouhemadou, Y. Al-Douri, S. B. Omran and A. H. Reshak, *Mater. Sci. Semicond. Process.*, 2015, **33**, 127–135.
- (3) G.I. Finch and S. Fordham, *Proc. Phys. Soc.*, 1936, **48**, 85-94.
- (4) C. R. A. Catlow, K. M. Diller and M. J. Norgett, *J. Phys. C: Solid State Phys.*, 1977, **10**, 1395-1412.
- (5) W.H. Baur, *Acta Crystallogr., Sect. B: Struct. Sci.*, 1976, **32**, 2200–2204.
- (6) L.E.A. Jones, *Phys. Chem. Minerals*, 1977, **1**, 179–197.
- (7) G. F. Davis, *Earth Planet. Sci. Lett.*, 1977, **34**, 300–306.
